# Supplementary material for: Genetic boundaries delineate the potential human pathogen Salmonella bongori into discrete lineages: divergence and speciation
Source: PubMed Central journal article supplement (PMC6894293; doi:10.1186/s12864-019-6259-z), 2019-12-04

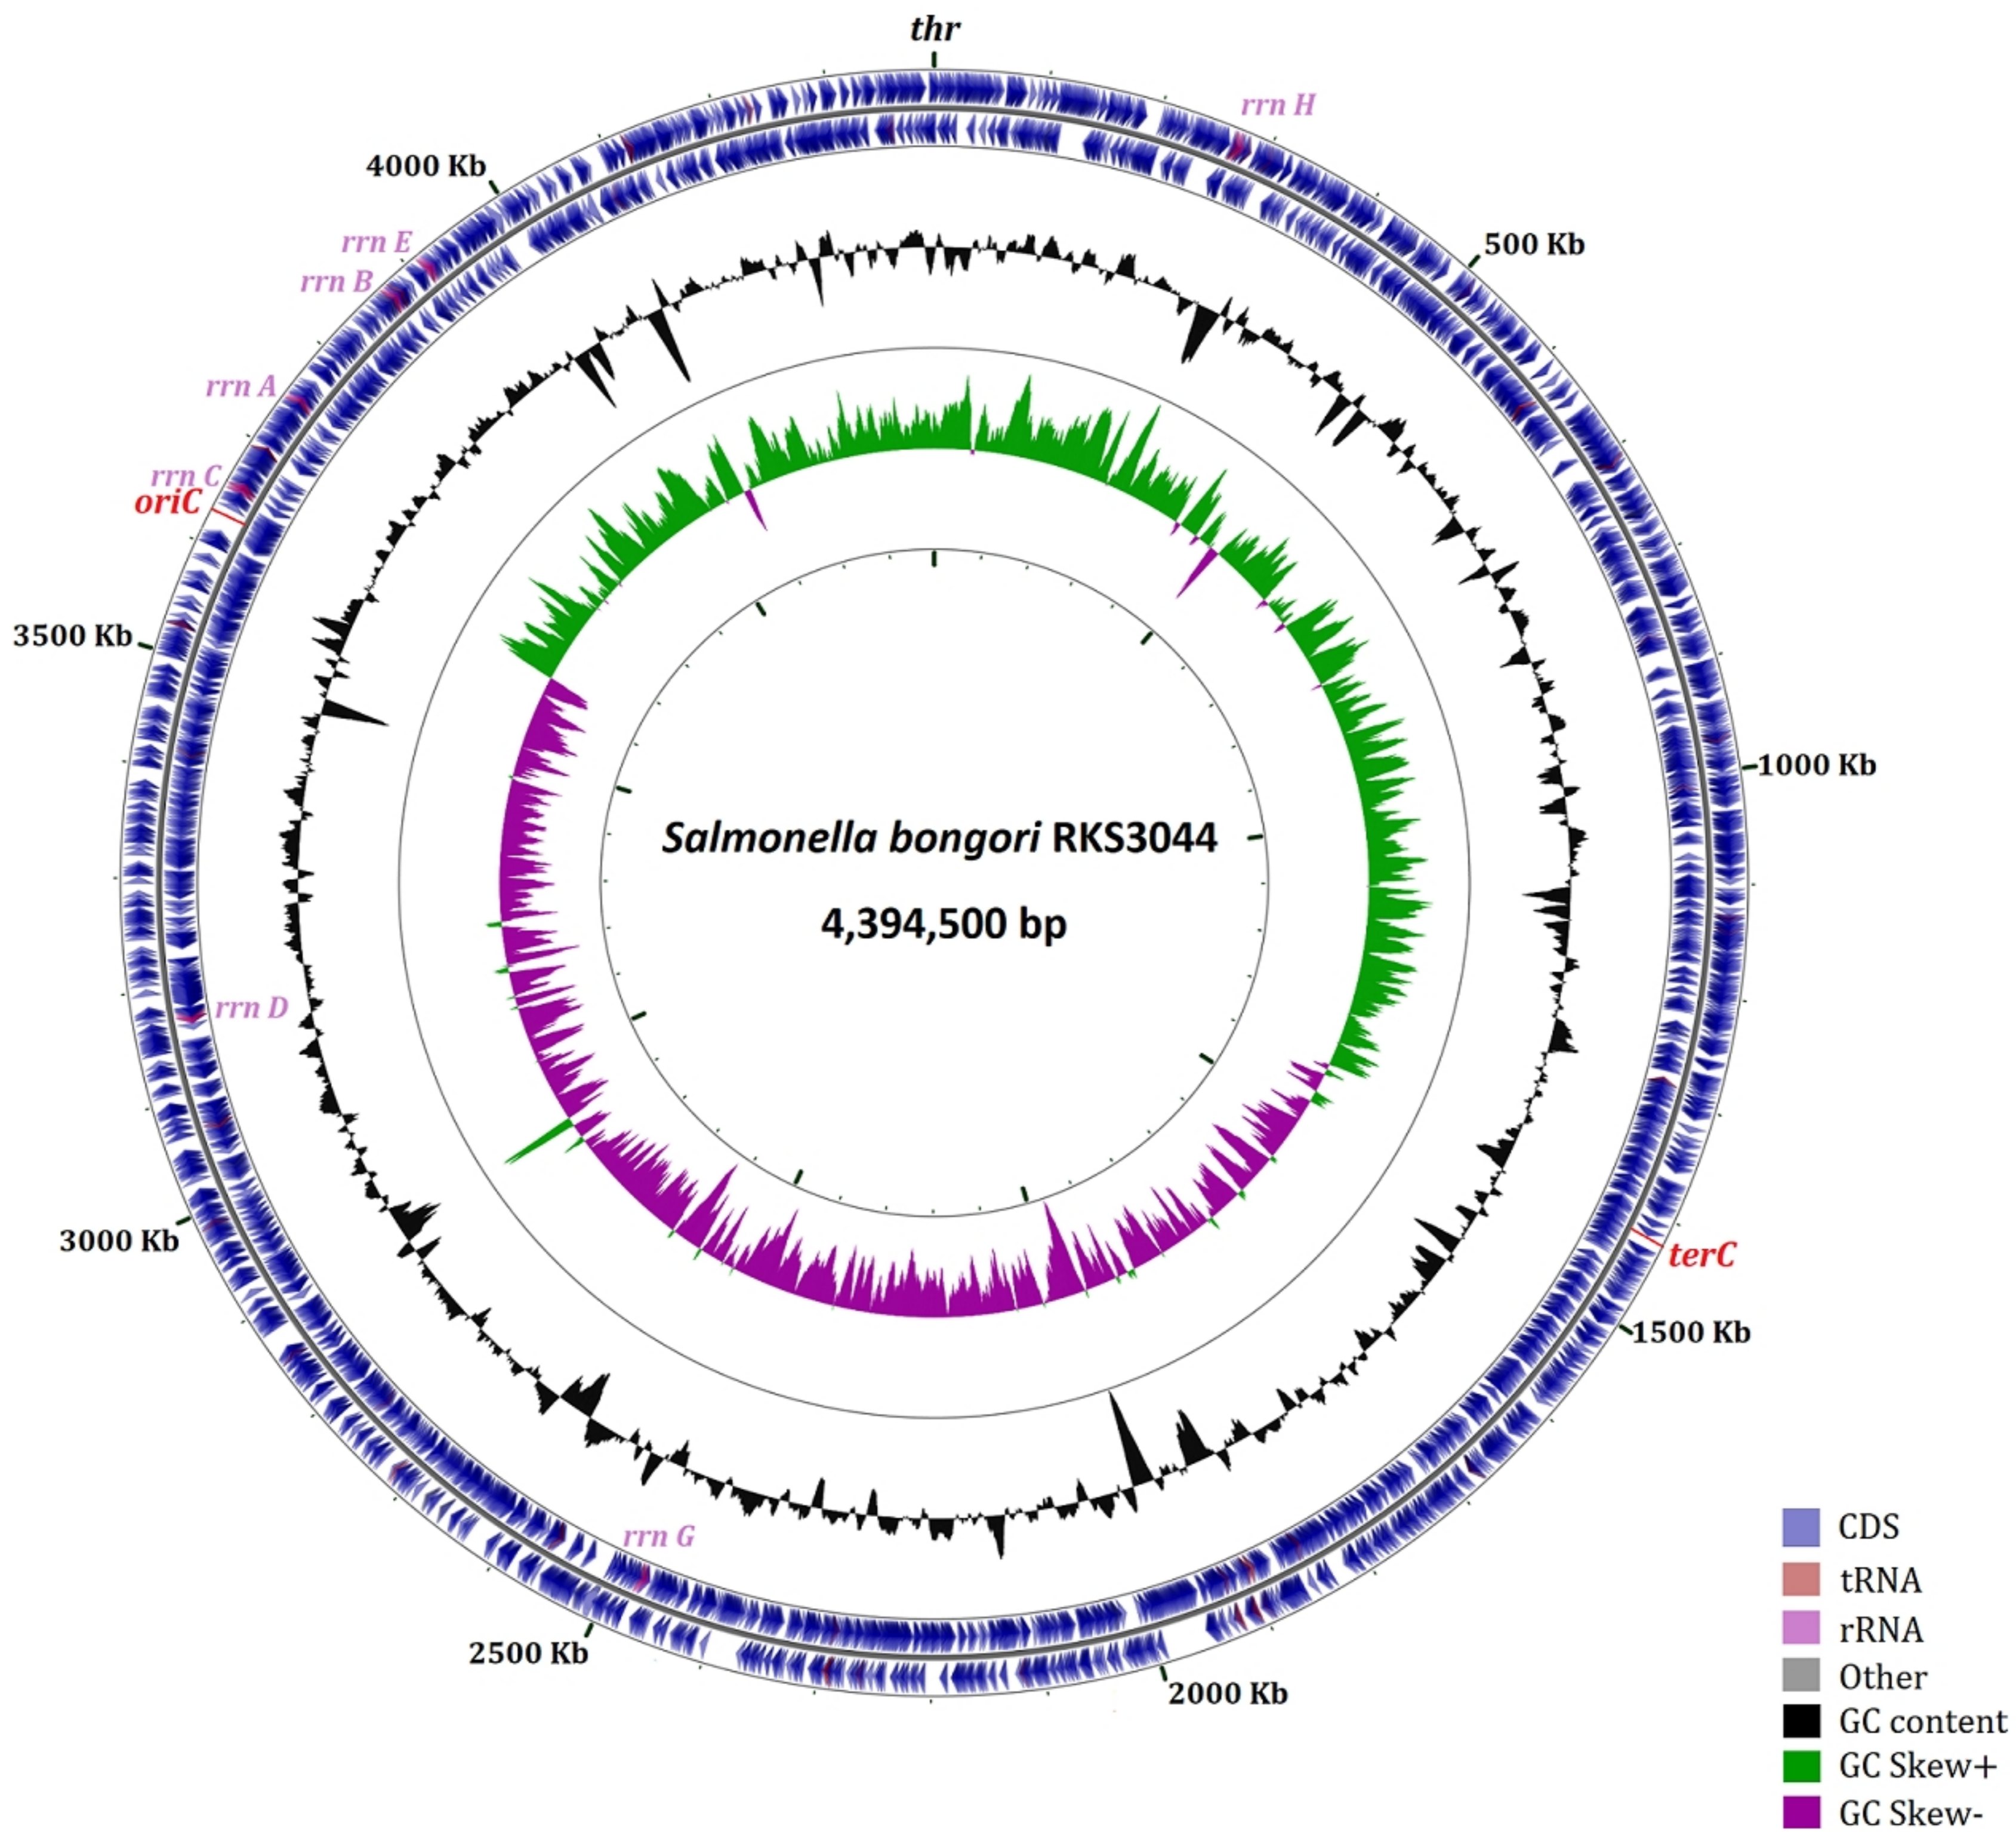

Supplement: 12864_2019_6259_MOESM1_ESM.pdf [file 12864_2019_6259_MOESM1_ESM.pdf]
